# Supplementary material for: Circular RNA NOX4 promotes the development of colorectal cancer via the microRNA-485-5p/CKS1B axis
Source: PubMed Central journal article supplement — Oncol Rep. 2020 Sep 7;44(5):2009–20. doi: 10.3892/or.2020.7758 (PMC7551031; doi:10.3892/or.2020.7758), 2020-09-07

Figure S1. si-circNOX4 and sh-circNOX4 specifically silence circNOX4, but not NOX4, in colorectal cancer cells. (A and B) NOX4 expression was measured in (A) SW480 and (B) SW620 cells transfected with si-NC or si-circNOX4 by RT-qPCR. (C) RT-qPCR was used to detect the expression levels of NOX4 in SW480 cells stably transfected with sh-NC or sh-circNOX4. circ, circular RNA; NOX4, NADPH oxidase 4; si, small interfering RNA; NC, negative control; sh, short hairpin RNA; RT-qPCR, reverse transcription-quantitative PCR.

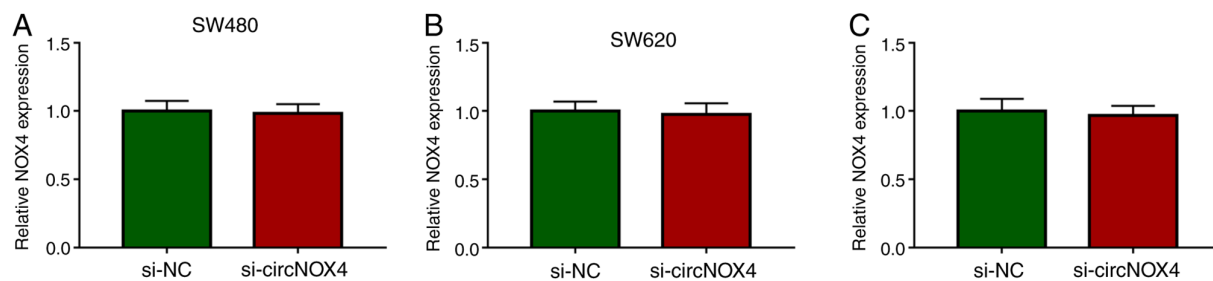

Figure S2. Identification of circNOX4 and miR-485-5p candidate targets in CRC cells. (A and B) miR-873-5p, miR-448, miR-485-5p and miR-339-5p were predicted to be candidate targets of circNOX4 using the circBank and starBase databases. RT-qPCR was applied to detect the expression of miR-873-5p, miR-448, miR-485-5p and miR-339-5p in (A) SW480 and (B) SW620 CRC cells transfected with si-NC or si-circNOX4. (C and D) MMP14, CKS1B, CREB1 and IGF2BP2 were predicted to be candidate targets of miR-485-5p using the starBase and TargetScan databases. The expression of these candidate targets was measured in miR-485-5p mimic-transfected (C) SW480 and (D) SW620 CRC cells by RT-qPCR. \*P<0.05 vs. si-NC or miR-NC. circNOX4, circular RNA NADPH oxidase 4; miR, microRNA; CRC, colorectal cancer; si, small interfering RNA; NC, negative control; RT-qPCR, reverse transcription-quantitative PCR; CKS1B, CDC28 protein kinase regulatory subunit 1B; MMP14, matrix metalloproteinase 14; CREB1, cAMP responsive element binding protein 1; IGF2BP2, insulin-like growth factor 2 mRNA-binding protein 2.

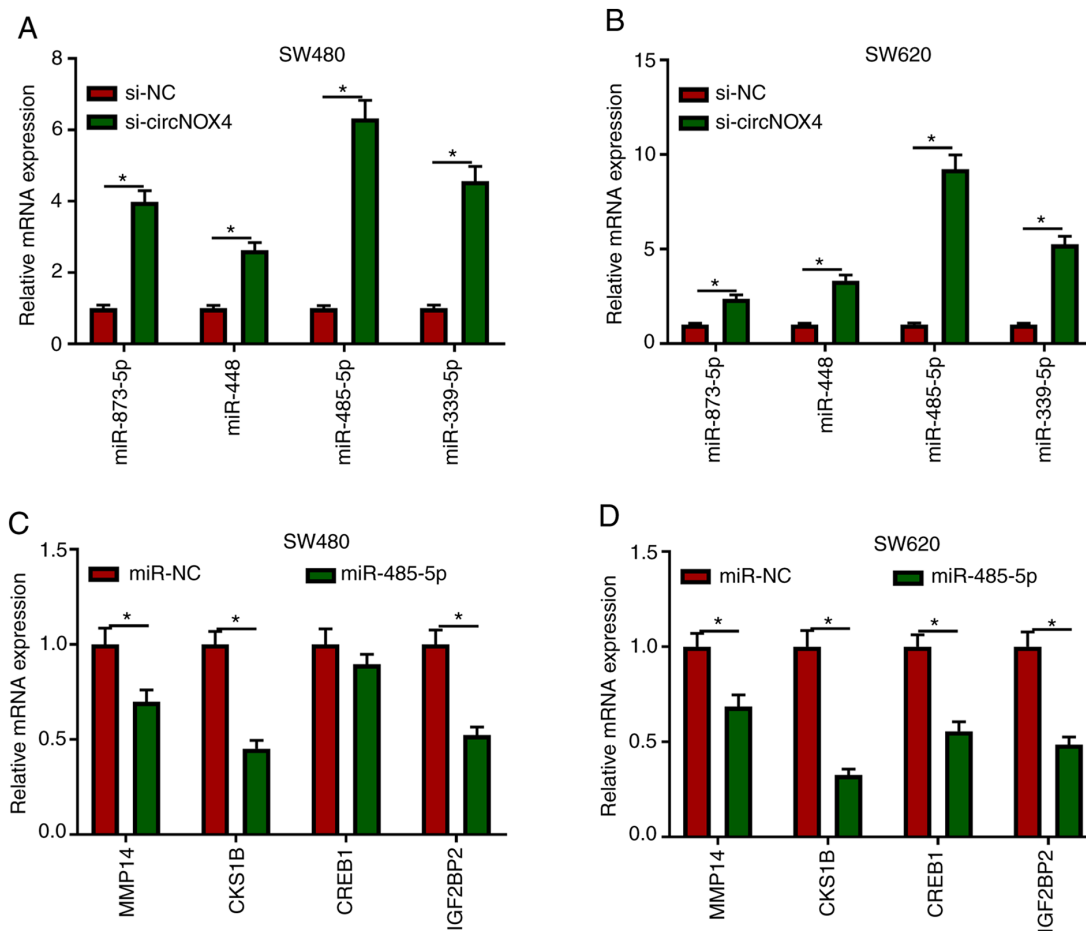

Figure S3. Transfection efficiencies of the miR-485-5p mimic, anti-miR-485-5p and CKS1B overexpression plasmid in CRC cells. (A) The transfection efficiencies of miR-485-5p and anti-miR-485-5p in CRC cells were assessed by RT-qPCR. (B and C) The mRNA and protein levels of CKS1B were measured in SW480 and SW620 cells transfected with the empty vector or the CKS1B overexpression vector by RT-qPCR. \* $P < 0.05$ . miR, microRNA; NC, negative control; CRC, colorectal cancer; RT-qPCR, reverse transcription-quantitative PCR; CKS1B, CDC28 protein kinase regulatory subunit 1B.

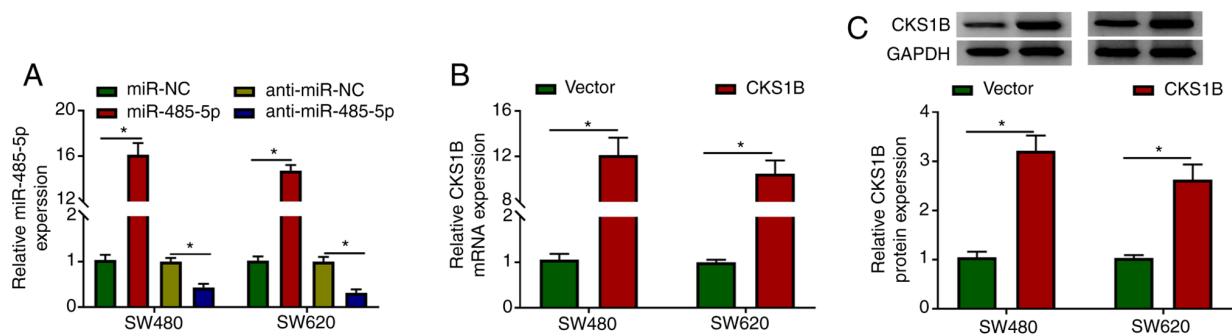

Supplement: Supplementary_Data.pdf [file Supplementary_Data.pdf]
